# Supplementary material for: A protein corona sensor array detects breast and prostate cancers
Source: Royal Society of Chemistry journal article supplement (doi:10.1039/d0nr03439h), 2020-01-01
Supplement: d0nr03439h2.xlsx [file d0nr03439h2.xlsx]

## Sheet: Foglio1
	L1			L2			L3
	healthy	Breast cancer	Prostate cancer	healthy	Breast cancer	Prostate cancer	healthy	Breast cancer	Prostate cancer
'HPT_HUMAN'	0.785357	1.27088	1.13382	0.468436	1.02548	0.941323	0.442816	0.402209	0.441512
'HPTR_HUMAN'	0.586905	0.187282	0.160694	0.402657	0.191939	0.0311404	0.385678	0.076379	0.165777
'A1AT_HUMAN'	0.857131	1.09735	0.855429	0.611047	1.20003	0.730261	1.21995	1.28082	1.17171
'AACT_HUMAN'	0.16404	0.254021	0.131734	0.12379	0.201398	0.0704616	0.00535664	0.153847	0.0977566
'A2MG_HUMAN'	0.231421	0.579825	0.548139	0.166644	0.618961	0.45371	0.194022	0.338338	0.276719
'CRP_HUMAN'	0	0	0.0161339	0.0113179	0	0.0111235	0.133702	0.141163	0.358269
'SAMP_HUMAN'	0	0.0393144	0	0.0452717	0.0769124	0	0	0.132041	0.029102
'A1AG1_HUMAN'	0.434897	0.805272	0.453387	0.206316	0.671681	0.305247	0.0696363	0.250844	0.239442
'FETUA_HUMAN'	0.826362	0.391754	0.403481	0.438932	0.423843	0.256941	0.194487	0.228622	0.217116
'CXCL7_HUMAN'	0.523184	0.321185	0.625491	0.757896	0.256328	0.467051	0.752991	0.0747138	0.0660879
'PLF4_HUMAN'	1.24851	0.974079	0.890731	1.69769	1.17983	0.532729	0.888229	0.344228	0.482844
'A1BG_HUMAN'	0.0813842	0.136285	0.0724386	0.0785967	0.158317	0.0295561	0.0547568	0.0769963	0.0340183
'GP1BA_HUMAN'	0.0254326	0.103903	0.148486	0.110035	0.121479	0.15568	0.00892774	0.0193589	0.043764
'SAA1_HUMAN'	0.0261592	0.0178623	0.0609746	0	0.0205393	0.0499497	0.65198	0.699117	0.816606
'GP1BB_HUMAN'	0.241378	0.0858164	0.196673	0.263656	0.107128	0.149485	0.0701233	0.0492222	0.00356896
'GPIX_HUMAN'	0.327678	0.255134	0.351671	0.439314	0.270459	0.319032	0.223287	0.0707148	0.0545522
'PECA1_HUMAN'	0.0397116	0.0284906	0.0710562	0.132951	0.0553852	0.0972902	0.00309782	0	0.0011332
'CD36_HUMAN'	0.0414599	0.053338	0.138867	0.154821	0.092064	0.137345	0.0339591	0	0
'LBP_HUMAN'	0.380049	0.322631	0.342902	0.384382	0.214689	0.241189	0.196478	0.0680326	0.0856644
'A1AG2_HUMAN'	0.122076	0.175549	0.165419	0.0353685	0.231121	0.100806	0.0964196	0.114593	0.191448
'SAA4_HUMAN'	0.451682	0.40831	0.36211	0.00650455	0.413503	0.310086	0	0.231558	0.316319
'GPV_HUMAN'	0.0120075	0.0121804	0.0662656	0.0811736	0.0377238	0.145013	0	0.00391186	0.0182379
'LRBA_HUMAN'	0	0	0	0.000886984	0	0.000282491	0	0	0
'FA8_HUMAN'	0	0	0	0	0	0.00307162	0	0	0
'F13A_HUMAN'	0.0705983	0.0416613	0.162213	0.175564	0.0737167	0.273171	0.0123913	0.0150814	0.0433003
'THRB_HUMAN'	0.172651	0.249381	0.204079	0.135411	0.302289	0.167716	6.24248	2.79685	3.66025
'FA9_HUMAN'	0	0.00798096	0	0	0	0.00229629	0.442541	0.623662	0.633852
'FA10_HUMAN'	0	0	0	0.0257225	0	0.00455443	0.285168	0.387061	0.378768
'PLMN_HUMAN'	0.287751	0.26257	0.39375	0.405766	0.32009	0.32662	0.214737	0.185597	0.25499
'FA12_HUMAN'	0.01885	0	0.00587599	0.074898	0	0	0	0	0
'ANT3_HUMAN'	0.0656448	0.0830523	0.0625868	0.122789	0.0857549	0.0329378	0.0339591	0.127588	0.0916925
'KNG1_HUMAN'	0.394205	0.241473	0.197498	0.381194	0.218158	0.116363	0.641012	0.633604	0.558346
'FIBA_HUMAN'	2.05474	1.16525	1.1623	1.17349	1.01195	1.21609	0.660389	1.83996	1.63633
'FIBB_HUMAN'	2.80557	1.5898	1.7597	1.90737	1.70648	1.91353	1.26952	3.33591	3.69829
'FIBG_HUMAN'	1.86636	1.40668	1.30839	1.47732	1.27636	1.35218	0.766412	2.08464	2.79982
'FINC_HUMAN'	0.116274	0.251946	0.218995	0.100054	0.201514	0.199766	0.0650129	0.138074	0.0734394
'PROC_HUMAN'	0	0	0	0	0	0	0.388151	0.460651	0.508793
'ITB3_HUMAN'	0.437791	0.408744	0.477795	0.575653	0.448682	0.389434	0.171413	0.0780186	0.131556
'F13B_HUMAN'	0.0048188	0	0	0	0	0.0438149	0	0	0.00587801
'ITB1_HUMAN'	0.0873955	0.0394295	0.076118	0.154335	0.0609904	0.077415	0.0189917	0.000878068	0
'PROS_HUMAN'	0.229503	0.206049	0.180907	0.150906	0.203906	0.088119	1.3953	1.11246	1.13024
'TSP1_HUMAN'	0.347775	0.587602	0.622823	0.525318	0.584946	0.58864	0.290006	0.15764	0.233006
'ITA2B_HUMAN'	0.36947	0.366975	0.468899	0.334279	0.385531	0.452819	0.149038	0.0746322	0.142136
'A2AP_HUMAN'	0.00665871	0.0743745	0.118627	0.020578	0.0927394	0.0186109	0.00934978	0.038336	0.0379989
'FA7_HUMAN'	0	0	0	0	0	0	0.0494459	0.139498	0.109638
'FA5_HUMAN'	0.135156	0.377244	0.277361	0.107228	0.340372	0.300956	0.119377	0.125251	0.175878
'ITA2_HUMAN'	0.00283898	0	0.00223928	0.0350943	0.000966498	0.00314465	0	0	0
'PROZ_HUMAN'	0	0	0	0	0	0	0.299972	0.524545	0.489708
'ITA6_HUMAN'	0.018744	0.00625216	0.0207079	0.0590403	0.0292333	0.0206213	0.00607367	0	0
'TSP4_HUMAN'	0	0	0	0	0	0	0.106729	0.0858464	0.112936
'FGL1_HUMAN'	0	0	0.00301759	0	0	0	0	0.134809	0.0830647
'ILK_HUMAN'	0.183114	0.0753917	0.306296	0.260756	0.146748	0.39216	0.0831855	0.0263298	0.0441018
'C1R_HUMAN'	0.112158	0.294684	0.336286	0.180379	0.252545	0.175839	0.0562447	0.463769	0.485124
'CFAB_HUMAN'	0.144788	0.134995	0.131615	0.0904776	0.113789	0.026118	0.0343822	0.000981175	0.00641538
'CO3_HUMAN'	1.78316	0.96383	0.92075	0.693752	0.90843	0.845071	0.442052	0.927538	0.773639
'CO5_HUMAN'	0.1237	0.0325766	0.0587914	0.0195656	0.00425706	0.00489011	0.0184633	0.0350558	0.0229602
'C1QA_HUMAN'	0.154943	0.797165	0.703205	0.0925022	0.71225	0.571431	0	0.0995418	0.182947
'C1QB_HUMAN'	0.386575	0.788757	0.728581	0.251509	0.777908	0.55844	0.0999907	0.218609	0.237236
'C1QC_HUMAN'	0.401443	0.427715	0.668602	0.239418	0.563708	0.409086	0.0890027	0.332302	0.300119
'CO9_HUMAN'	0.840001	0.339161	0.398063	0.583861	0.284832	0.22365	0.269363	0.233218	0.272603
'CFAI_HUMAN'	0.0194212	0	0	0.0107177	0	0	0.29218	0.334831	0.25771
'CO8A_HUMAN'	0.194383	0.0290102	0.0385257	0.0348244	0.0029613	0.00161005	0.0553794	0.0282661	0.0135553
'CO8B_HUMAN'	0.166716	0.0840318	0.0857611	0.120358	0.07219	0.0513521	0.0402947	0.0130653	0.0025581
'CO8G_HUMAN'	0.291318	0.129143	0.0812408	0.147905	0.00866217	0	0.0467489	0	0
'CFAH_HUMAN'	0.483475	0.192353	0.228693	0.362336	0.187733	0.125505	0.167405	0.0856985	0.0952799
'C1S_HUMAN'	0.0760995	0.0914839	0.127335	0.0955409	0.0722108	0.0245979	0.230405	1.07834	1.18166
'CO4A_HUMAN'	0.774204	0.0107151	0.0178452	0.480132	0.0155505	0.0104899	2.42131	0.0583369	0.0552724
'CO4B_HUMAN'	0.81595	0.358048	0.318879	0.554168	0.348587	0.227863	2.44663	1.63271	1.29689
'CO7_HUMAN'	0.163634	0.0253175	0.0227298	0.0331109	0.00357344	0.00557009	0.0150442	0	0
'CO6_HUMAN'	0.224969	0.0113872	0.00334534	0.047158	0.00240216	0	0.048975	0.00424987	0.00980411
'FHR1_HUMAN'	0.409598	0.0916309	0.00634293	0.662694	0.0759195	0.0414095	0.0676628	0.0204124	0.0045691
'LV861_HUMAN'	0	0.11051	0.0349322	0	0.112173	0.0307035	0	0.00886539	0.0231128
'KV127_HUMAN'	0	0.00973991	0.00846855	0	0.0104432	0.024744	0	0.00610759	0
'LV539_HUMAN'	0	0.0191306	0	0	0.0683052	0.0734914	0	0	0
'KVD11_HUMAN'	0	0.133697	0.178103	0	0.246727	0.0189289	0	0.0188879	0.00613917
'HV349_HUMAN'	0	0.0687318	0.0355395	0	0.0947491	0.00803581	0	0	0
'HV601_HUMAN'	0	0.194802	0.136234	0	0.19857	0.0808468	0	0.0702944	0.0312483
'HV315_HUMAN'	0	0.121006	0.0547049	0	0.0457642	0.0304374	0	0	0
'HV374_HUMAN'	0	0.190636	0.226448	0	0.296752	0.130163	0	0.147574	0.123905
'HV372_HUMAN'	0	0.327157	0.218648	0	0.18591	0.132413	0	0.0753168	0.0553771
'HV124_HUMAN'	0	0	0	0	0	0	0	0.0061544	0.0127751
'HVD82_HUMAN'	0	0.0847684	0.124484	0	0.131176	0.0164222	0	0	0
'KV224_HUMAN'	0	0.0708172	0.118261	0	0.0548448	0	0	0	0
'IGLC7_HUMAN'	0	0.108975	0	0	0.0651531	0	0	0.00860334	0
'IGJ_HUMAN'	0.447613	0.466071	0.521034	0.314387	0.613598	0.387468	0.214266	0.171463	0.178447
'KV133_HUMAN'	0	0.0191009	0.054871	0	0.0299192	0	0	0	0.0192759
'KV320_HUMAN'	0	0.277367	0.467969	0	0.318381	0.306313	0	0.189854	0.139381
'LV151_HUMAN'	0	0.164459	0.0407315	0	0.169178	0.0333951	0	0.0312022	0.0208458
'HV146_HUMAN'	0	0.110488	0.0809034	0	0.0651005	0.0232123	0	0.00878382	0
'HV307_HUMAN'	0	0.534048	0.234878	0	0.395754	0.172854	0	0.0690132	0.183698
'HV43D_HUMAN'	0	0.00850722	0.038565	0	0.0148242	0.0183588	0	0	0.00643998
'HV205_HUMAN'	0	0	0	0	0.0210066	0	0	0.0292443	0
'IGKC_HUMAN'	2.91457	1.1967	1.31779	2.08674	1.21851	1.1594	1.67127	0.794882	0.689091
'IGHG2_HUMAN'	1.32249	0.764468	0.894403	0.833125	0.780796	0.419219	0.667795	0.290508	0.484153
'IGHG3_HUMAN'	1.13442	0.802798	0.671307	0.88335	0.602806	0.431327	0.808984	0.316282	0.367578
'IGHG4_HUMAN'	0.122076	0.18175	0.243535	0.137544	0.135117	0.19475	0.428531	0.129765	0.092611
'IGHM_HUMAN'	1.70035	1.12083	1.41064	1.37432	1.64919	0.84584	0.519485	0.51904	0.569242
'IGHA1_HUMAN'	0.708364	0.881142	0.845887	0.443037	0.767677	0.664453	0.521004	0.465643	0.707588
'KV401_HUMAN'	0	0.434658	0.29081	0	0.255372	0.13444	0	0.0200441	0.0203641
'IGK_HUMAN'	0	1.38978	1.39052	0	1.5901	0.979703	0	0.905867	1.11036
'IGLC3_HUMAN'	0	1.74305	1.04737	0	1.01576	0.777769	0	0.546815	0.578554
'LV321_HUMAN'	0	0.230589	0.142929	0	0.210487	0.170361	0	0.0905547	0.0876571
'APOL1_HUMAN'	0.183114	0.373547	0.331273	0.170412	0.300102	0.292836	0.0730451	0.0258516	0.0695365
'APOM_HUMAN'	0	0.219879	0.23357	0	0.0934864	0.312271	0.544847	0.580305	0.501841
'APOA1_HUMAN'	2.81169	2.45683	2.02049	1.09985	2.35956	1.53665	1.14459	1.72932	2.23018
'APOE_HUMAN'	2.08547	1.64106	1.40798	0.782037	1.72741	1.26288	2.40692	2.10919	2.20926
'APOA2_HUMAN'	2.14743	1.11594	1.13993	0.823121	1.04587	1.01358	1.48428	3.00708	1.71223
'APOC1_HUMAN'	1.11903	1.08334	1.14803	0.251509	1.38227	1.31428	0.528522	0.858265	0.86313
'APOC2_HUMAN'	1.44827	0.566484	0.98132	1.01604	0.768804	0.997791	2.17382	4.73788	4.10973
'APOC3_HUMAN'	3.91199	2.89387	1.60922	2.32789	1.13789	1.03001	3.92691	8.59858	8.63364
'APOB_HUMAN'	0.251605	0.752531	0.941202	0.291722	0.814566	1.07769	0.128559	0.312285	0.462415
'APOD_HUMAN'	0.514464	0.573986	0.561287	0.316632	0.579606	0.612992	1.43864	1.12096	1.07412
'APOA4_HUMAN'	0.984749	1.02494	0.816608	0.00650455	0.962852	0.672167	0	1.31871	1.39345
'APOA_HUMAN'	0.088085	0.10752	0.124153	0.0547823	0.123952	0.103141	0.0102642	0.0127131	0.0272652
'APOC4_HUMAN'	0.097661	0.423354	0.47191	0	0.359509	0.304896	0	0.0327395	0.0427947
'APOF_HUMAN'	0.0104637	0.0771029	0.0581848	0	0.088134	0.0393586	0.227734	0.354828	0.427716
'APOA5_HUMAN'	0.0267972	0.00495908	0.00627799	0	0.0159899	0.00449265	0.0438983	0.0857519	0.0716831
'ALBU_HUMAN'	5.67124	3.6481	3.34215	3.84645	3.13552	2.4611	2.68298	2.91911	3.16492
'CD5L_HUMAN'	0.462605	0.64824	0.571489	0.394638	0.681723	0.469031	0.226671	0.215366	0.162699
'AMBP_HUMAN'	0.211286	0.229926	0.359363	0.282948	0.367472	0.136125	2.02069	1.09079	0.988009
'TRFE_HUMAN'	1.02021	1.137	0.88093	0.749628	1.24047	0.669362	0.540951	0.487059	0.32155
'CD44_HUMAN'	0	0	0	0	0	0	0.0376271	0.0160634	0.0190471
'CD151_HUMAN'	0	0.0553777	0.0284738	0	0.0218476	0.0656247	0	0.00568389	0
'CD226_HUMAN'	0	0	0.027132	0.0145102	0.0154335	0.0305521	0	0	0
'KRT83_HUMAN'	0	0.143954	0	0	0	0.00391786	0	0.00407291	0
'K1C14_HUMAN'	0.662029	1.07465	0.642892	0.293831	1.11317	1.15068	0.262063	0.271327	0.0978689
'K2C6A_HUMAN'	0	0.121923	0.131466	0	0.133104	0.152004	0.362109	0.062348	0.0334729
'K1C16_HUMAN'	0.736048	0.971378	0.521083	0.177536	0.873063	0.87173	0.335263	0.24113	0.0693268
'K1C10_HUMAN'	0.670385	1.69215	1.31017	0.412433	1.58977	2.28372	0.398752	0.864444	0.515401
'K2C5_HUMAN'	0.425298	0.556929	0.342137	0.228184	0.554532	0.639149	0.257119	0.116534	0.0632963
'K2C4_HUMAN'	0.0160627	0.0114471	0	0	0	0.0539966	0	0	0.0223605
'K1C17_HUMAN'	0.194559	0.449128	0.193305	0.0589475	0.44574	0.483549	0.30265	0.0337144	0.0107849
'K2C80_HUMAN'	0	0.0191383	0.00472345	0	0.0227556	0.17014	0	0	0
'K2C78_HUMAN'	0	0.141219	0.0261265	0	0.115755	0.237016	0	0	0
'K2C1B_HUMAN'	0	0.0382428	0.0210841	0	0.00339597	0.141531	0	0	0
'K1C23_HUMAN'	0	0	0	0	0	0.0091046	0	0.00745706	0
'ARC1B_HUMAN'	0.0535945	0.0152517	0.0215044	0.0931658	0.0466954	0.0669533	0.00627119	0	0
'ARPC2_HUMAN'	0	0.022272	0.0720363	0.016644	0	0.0695593	0	0	0
'ARPC3_HUMAN'	0	0	0.105856	0.0404211	0.035236	0.0916667	0	0.00782759	0
'ARPC5_HUMAN'	0	0.0258297	0.0570084	0.0530528	0.0236564	0.164811	0	0	0
'ACTN4_HUMAN'	0.0122076	0.0011602	0.00643387	0.233095	0.00518866	0.0129854	0.00734625	0	0
'K2C6B_HUMAN'	0.0915572	0.929131	0.630841	0	0.983932	0.900555	0.252834	0.250076	0.0968191
'K2C1_HUMAN'	2.0753	2.27516	1.92497	0.923868	2.24593	2.60802	0.699285	0.984146	0.6856
'GELS_HUMAN'	0.432235	0.503386	0.637282	0.526415	0.470202	0.48987	0.472381	0.44124	0.489535
'ACTN1_HUMAN'	0.160003	0.378542	0.587486	0.438157	0.425925	0.607866	0.0848742	0.0826591	0.169303
'K1C9_HUMAN'	1.82228	1.75535	1.48391	0.622942	1.92068	2.73014	0.33384	0.895181	0.605434
'ARPC4_HUMAN'	0	0.0570609	0.092176	0.070737	0.0615446	0.0596068	0	0	0
'ARP3_HUMAN'	0.0350645	0.0158796	0.0755254	0.153514	0.0609698	0.0765795	0	0	0.00635353
'ARP2_HUMAN'	0	0.00848354	0.0344947	0.0754528	0.00699938	0.0852961	0.00571375	0	0
'ACTS_HUMAN'	0.941731	0.143661	0.185348	0	0.127904	0.132818	0	0.0657325	0.151339
'ESYT2_HUMAN'	0	0.00115233	0.00180037	0.005548	0.00104009	0.00279294	0	0.000751307	0
'FILA_HUMAN'	0.00378857	0.0376647	0.00859379	0	0.0287538	0.0502236	0.000591078	0.00258246	0.000766255
'FILA2_HUMAN'	0.046517	0.109803	0.0446383	0.013691	0.0756394	0.102185	0.00984931	0.00771514	0.00672756
'HORN_HUMAN'	0.166881	0.271466	0.1131	0.0662219	0.196486	0.213593	0.0173236	0.0546728	0.0286796
'KIF2A_HUMAN'	0	0.00176718	0.00777249	0.0300632	0.00904768	0.00493589	0	0.00121086	0
'PDLI1_HUMAN'	0	0.165257	0.27543	0.196492	0.189542	0.269538	0.00714219	0.00661083	0.0215573
'SNP23_HUMAN'	0	0.00995058	0.0445431	0.0738125	0.0352969	0.0691914	0	0	0
'MASP2_HUMAN'	0	0.00302093	0.0139837	0	0.0125497	0.00966148	0	0.0816332	0.098895
'RB27B_HUMAN'	0.0219737	0.080198	0.188578	0.203723	0.13669	0.188964	0	0.0198196	0.0275665
'PGRC1_HUMAN'	0	0.00561338	0.00915397	0	0.060766	0.0349016	0	0	0
'CLIC1_HUMAN'	0	0	0.100572	0.020578	0.0313938	0.107023	0.0186996	0.00288365	0.0146535
'QSOX1_HUMAN'	0	0.00470533	0.00807943	0.0306811	0	0.00634713	0	0	0
'DNM1L_HUMAN'	0	0	0.00935115	0.0103518	0	0.0240551	0	0	0
'ADA10_HUMAN'	0	0.00308108	0.00630292	0.0421054	0.00147698	0.00116018	0	0	0
'ML12A_HUMAN'	0.137336	0.456873	0.560151	0.346611	0.510404	0.622437	0.0578517	0.0664991	0.195658
'FYB_HUMAN'	0	0	0.0094117	0	0.0024937	0.00444797	0	0	0
'SCAM2_HUMAN'	0	0	0	0	0	0.00464275	0	0	0
'STX7_HUMAN'	0	0.00371419	0.00304316	0	0.00763673	0.00606716	0	0	0
'TGFI1_HUMAN'	0	0	0.0269757	0.0311243	0.0117138	0.0263091	0	0	0.00392377
'KALRN_HUMAN'	0	0	0	0	0	0.00102234	0	0	0
'DIAP1_HUMAN'	0	0	0.0241043	0.0210706	0.00178084	0.0399234	0	0	0.00139918
'H2B1L_HUMAN'	0	0.0146483	0	0	0.0104067	0.0772476	0	0	0
'WDR1_HUMAN'	0.072136	0.00425146	0.0534111	0.0857418	0.0163502	0.0861898	0.00779148	0	0.00153988
'ROCK2_HUMAN'	0	0	0.00440146	0.0193319	0.00433112	0.00116694	0	0	0
'GGCT_HUMAN'	0	0	0	0	0	0.0560883	0	0	0
'CISY_HUMAN'	0	0	0	0	0.0139541	0.0274876	0	0	0
'SC22B_HUMAN'	0	0.0056977	0.00826783	0	0	0.0265227	0	0	0
'STX11_HUMAN'	0.0110978	0.0374714	0.0361768	0.171484	0.0460136	0.076272	0	0	0
'SKAP2_HUMAN'	0	0.0089767	0.00447122	0	0	0.00457027	0	0	0
'FCN3_HUMAN'	0	1.34585	1.20902	0	1.87507	1.42489	0.0272702	0.751975	0.497131
'PRAF3_HUMAN'	0	0.0454378	0.0971608	0	0.0706366	0.154742	0	0	0.00964602
'FLOT1_HUMAN'	0	0.013234	0.0198313	0.0331109	0.036456	0.0222131	0	0	0
'PDE5A_HUMAN'	0	0	0.00447129	0.00565896	0	0.00800053	0	0	0.000882113
'ENDD1_HUMAN'	0.0133174	0.0112848	0.0201884	0.0514451	0.015375	0.0213185	0	0.00152541	0
'CAVN2_HUMAN'	0	0.23852	0.304636	0	0.225208	0.32222	0	0.0496288	0.0673188
'G6B_HUMAN'	0	0.0349032	0.0984047	0.0489718	0.0694804	0.0672454	0	0.0150211	0
'LDHA_HUMAN'	0.0445413	0.0100527	0.0238738	0.0611779	0	0.0627359	0.0243221	0	0
'NB5R3_HUMAN'	0.0107714	0.068825	0.165215	0.029127	0.08984	0.221047	0	0	0.00273205
'CERU_HUMAN'	0.0945591	0.164226	0.117661	0.0718966	0.151035	0.0547096	0.132774	0.686112	0.618829
'PNPH_HUMAN'	0	0	0.00582563	0.0265264	0	0.00824849	0	0	0
'PGK1_HUMAN'	0.00813842	0	0.00948486	0.0440141	0	0.00803595	0.00857063	0	0
'CAH1_HUMAN'	0	0	0.0374133	0.00975683	0	0.032699	0.0797955	0	0.00328364
'CAH2_HUMAN'	0	0	0	0	0	0.00719047	0	0	0
'ANGT_HUMAN'	0	0.091793	0.0385883	0.0186852	0.0958204	0.0330169	0.0315334	0.0951746	0.102723
'CYTA_HUMAN'	0	0	0.0216838	0	0.0153022	0.23736	0	0	0
'TGFB1_HUMAN'	0.0166468	0.00634664	0.0291729	0.106106	0.0138699	0.0368213	0	0	0
'HBD_HUMAN'	0	0.259597	0.294531	0	0.269595	0.125574	0.634762	0	0.0454288
'SPTA1_HUMAN'	0.00261592	0.582175	0.434954	0.0141474	0.58724	0.459908	0	0.0042809	0.00452252
'GLPA_HUMAN'	0	0.169988	0.128352	0	0.12324	0.153955	0	0	0
'B3AT_HUMAN'	0.0969429	0.662742	0.549634	0.095703	0.584785	0.554906	0.00252077	0.0916534	0.106763
'APOH_HUMAN'	0.477061	1.00738	1.16248	3.00818	0.923152	1.38805	0.294333	0.223475	0.345532
'RET4_HUMAN'	0.031846	0.103169	0.00477084	0	0.0217261	0	0.0782536	0.572386	0.340767
'TTHY_HUMAN'	0.469231	0.743892	0.430055	0.24758	0.661421	0.215666	0.369608	1.60783	0.846893
'VTDB_HUMAN'	0.310949	0.609171	0.57063	0.389721	0.670583	0.739675	0.126134	0.12492	0.140459
'HEMO_HUMAN'	0.278193	0.486734	0.369452	0.149636	0.522978	0.326505	0.066752	0.16784	0.16445
'PRPC_HUMAN'	0	0.0444028	0.0510185	0	0.0290389	0.129519	0	0	0.0441159
'KLKB1_HUMAN'	0.0722141	0.0199075	0.00362523	0.167378	0.00371992	0	0	0	0.00232451
'C4BPA_HUMAN'	1.07409	0.640564	0.449735	0.424422	0.616292	0.157462	5.36688	3.24188	3.08021
'VTNC_HUMAN'	0.315364	0.791507	0.311367	0.47944	0.33602	0.329406	4.09724	3.98367	4.44231
'CATA_HUMAN'	0.0183114	0.0922932	0.0443242	0.0448001	0.101758	0.0870172	0	0.00278057	0.00146734
'ALDOA_HUMAN'	0.248848	0.0571915	0.127905	0.282948	0.0877018	0.169827	0.0922991	0	0.00523019
'ANXA1_HUMAN'	0	0	0	0	0	0.0493703	0.0395567	0	0.0129932
'SODM_HUMAN'	0.0439475	0.0749716	0.0889977	0.299925	0.148634	0.165085	0.041139	0	0
'LCAT_HUMAN'	0	0	0.0030199	0	0	0	0.105419	0.264136	0.302946
'HRG_HUMAN'	0.421163	0.265538	0.103382	0.372548	0.191811	0.118974	0.124274	0.194332	0.197735
'VWF_HUMAN'	0.0545195	0.0236452	0.0599267	0.128197	0.0324488	0.104155	0.0449334	0.000561719	0.00259442
'SHBG_HUMAN'	0	0.0996034	0.0319691	0	0.0339268	0.0188282	0	0	0
'G3P_HUMAN'	0.427267	0.330573	0.477764	0.47944	0.3041	0.491962	0.271403	0.217386	0.36315
'1A03_HUMAN'	0	0.063971	0.217863	0.220837	0.113935	0.22097	0	0.0060184	0.0317555
'CPNS1_HUMAN'	0	0	0.0115578	0.0656844	0.00365228	0.0278656	0	0	0.00359984
'AMY1_HUMAN'	0.0978715	0	0	0	0	0.0299104	0	0	0.0346319
'HSPB1_HUMAN'	0	0.0102004	0.110929	0.0430573	0.0332096	0.170841	0.0558954	0.00705933	0
'RPN1_HUMAN'	0	0.00333519	0.00405197	0.0348559	0.00793406	0.0155962	0	0	0
'RPN2_HUMAN'	0	0.00294984	0.00444861	0	0	0.0158847	0	0	0
'GNAI2_HUMAN'	0.164803	0.0809979	0.135711	0.141474	0.0964632	0.192531	0	0	0.00509701
'ARGI1_HUMAN'	0	0.00403407	0.0100311	0	0	0.070271	0	0	0
'S10A8_HUMAN'	0.0332935	0.262899	0.154477	0.0514451	0.49506	0.191019	0.490863	0.0185632	0.0724713
'ADT2_HUMAN'	0.0388425	0.0503977	0.119715	0.158622	0.0684382	0.150031	0	0.00470405	0
'IC1_HUMAN'	0	0.111832	0.0801389	0.020578	0.111501	0.018081	0.0186996	0.321158	0.17808
'TETN_HUMAN'	0	0.00621749	0	0.0738125	0	0.00821542	0	0	0.0034391
'HEP2_HUMAN'	0.282703	0.513542	0.467026	0.349962	0.269624	0.223519	0.23682	0.371608	0.331584
'KPCB_HUMAN'	0	0	0.00258606	0.0716557	0	0.00637934	0	0	0
'MYL1_HUMAN'	0	0.0414213	0.126224	0	0.0620079	0.126244	0	0.0112773	0.0352775
'ATPB_HUMAN'	0.147777	0.0819011	0.162704	0.268056	0.110207	0.218447	0.0496194	0	0.00525801
'S10A9_HUMAN'	0.281714	0.288462	0.294725	0.152357	0.557613	0.498936	0.405457	0.0718942	0.012952
'ENOA_HUMAN'	0.12857	0.0565648	0.106329	0.117393	0.0340234	0.151697	0.0218825	0	0
'TPM3_HUMAN'	0.127625	0.214817	0.244642	0	0.171068	0.198554	0.0311659	0.0245636	0.0518628
'LDHB_HUMAN'	0.168267	0.00687896	0.061631	0.160592	0.0301275	0.0753288	0.0173729	0	0
'GPX1_HUMAN'	0	0.0444627	0.133433	0.231503	0.0765785	0.190609	0	0.00699644	0
'PDIA1_HUMAN'	0	0	0.0179236	0.076942	0.00858203	0.0303437	0	0	0.00290457
'CATD_HUMAN'	0	0	0	0	0	0.0433044	0	0	0
'ANXA2_HUMAN'	0.0375619	0.0340829	0.02869	0.0217652	0.0926291	0.159829	0.112077	0	0
'CAN1_HUMAN'	0.00446621	0	0.0048806	0.0621105	0.0104358	0.011097	0	0	0
'TBB5_HUMAN'	0.0219737	0.0406806	0.101376	0.568725	0.0879745	0.16116	0.3034	0.0116452	0.0159168
'PROF1_HUMAN'	0.500513	0.170921	0.39208	0.594191	0.150534	0.310974	0.188554	0.0582525	0.0444442
'HS90A_HUMAN'	0.00646286	0.00413823	0.0209074	0.024966	0.00427645	0.0152049	0.0181496	0.000908395	0.00123135
'LYN_HUMAN'	0.00620727	0.00390437	0.00527436	0.0815274	0.00358319	0.00358632	0	0	0
'CBG_HUMAN'	0	0.0434978	0.0156107	0	0.0139707	0	0	0	0
'SODE_HUMAN'	0	0	0	0	0	0	0.212617	0.236284	0.126037
'PLEK_HUMAN'	0.196848	0.150825	0.173925	0.346611	0.155083	0.273492	0.183197	0.0298159	0.0476276
'CD14_HUMAN'	0.105291	0.00308814	0.0331835	0.0778107	0	0	0	0	0
'SPRC_HUMAN'	0	0	0.0163706	0	0.0133287	0.0186869	0.029385	0.00242325	0.0279861
'TPM1_HUMAN'	0.0388425	0.0370826	0.0456155	0.188632	0.051427	0.0454828	0.0350617	0.00237353	0
'RL40_HUMAN'	0	0.0616888	0.00738009	0	0.0927542	0.0645919	0	0	0
'HS71B_HUMAN'	0	0	0.00447058	0	0	0	0	0	0
'IGA2_HUMAN'	0	0.0918802	0.13397	0	0.12333	0.108722	0	0.0161294	0.0326297
'IGG1_HUMAN'	0	0.913661	1.01675	0	0.934796	0.790539	0	0.754214	0.833981
'IGL1_HUMAN'	0	1.03977	0.864663	0	0.871017	0.613833	0	0.439731	0.457978
'CALM3_HUMAN'	0	0	0.0388527	0	0.0415374	0.0124354	0	0.0144026	0.0122453
'SRGN_HUMAN'	0	0.0357894	0.0774949	0.047158	0.0751133	0.0803891	0	0	0
'THIO_HUMAN'	0	0.0330313	0.0776783	0	0.0930212	0.160394	0	0	0
'CMGA_HUMAN'	0	0	0	0	0	0	0	0.0243554	0.0213828
'CH60_HUMAN'	0.213133	0.0189417	0.0606519	0.27599	0.0528283	0.0569838	0.0569033	0	0.00661624
'CLUS_HUMAN'	0.824015	0.589497	0.570635	0.612147	0.561592	0.507978	4.07929	2.58902	2.65965
'GRP78_HUMAN'	0.0813842	0.019952	0.0486552	0.163088	0.0454257	0.0756491	0.0517809	0.00106321	0.00504038
'HSP7C_HUMAN'	0.123796	0.0712671	0.213224	0.229148	0.0779252	0.154638	0.0814813	0.00108473	0.00554653
'GTR1_HUMAN'	0.0271281	0.171955	0.130686	0.0340586	0.208903	0.20433	0	0.00440913	0.00597953
'GTR3_HUMAN'	0.0406921	0.107546	0.0797347	0.120515	0.0676396	0.117169	0	0.0104199	0.0141923
'41_HUMAN'	0	0.188665	0.121129	0	0.176553	0.145629	0	0	0
'MBL2_HUMAN'	0	0	0	0	0	0	0.0197784	0.085124	0.141754
'SPTB1_HUMAN'	0.0111655	0.586859	0.446274	0.0241541	0.523236	0.48415	0	0.00541212	0.0128546
'LAMP1_HUMAN'	0	0	0	0	0.00237208	0.00854164	0	0	0
'CETP_HUMAN'	0.126515	0.0403214	0.0731132	0.0385838	0.00610303	0.00383632	0.00467489	0	0.001461
'ADT3_HUMAN'	0	0	0.0149212	0.0728805	0.0101879	0.0121775	0	0	0
'PIP_HUMAN'	0.0646286	0.105166	0.123236	0	0.348423	0.350432	0	0	0.0200041
'SRC_HUMAN'	0.00610381	0.0278799	0.0402392	0.0518738	0.0335421	0.0540716	0	0	0
'BMP1_HUMAN'	0	0	0	0	0	0	0.00231639	0.00273495	0.00387123
'MYH6_HUMAN'	0	0.0150024	0	0	0	0	0	0	0
'CD59_HUMAN'	0	0.159373	0.104069	0	0.162791	0.0805221	0	0	0
'GLU2B_HUMAN'	0	0	0.00157432	0.0191829	0	0.00329652	0.0196108	0.0249812	0.00926615
'CX7A2_HUMAN'	0	0	0.0193131	0	0.0142989	0.0409228	0	0	0
'NID1_HUMAN'	0	0.00256884	0.000685979	0.0020805	0.0059087	0.000660967	0.0255228	0.00637326	0.00520064
'KPYM_HUMAN'	0.157857	0.0555874	0.262575	0.258556	0.0928046	0.325163	0.0509805	0.00567297	0.0235182
'ENPL_HUMAN'	0.0238845	0.0110731	0.0315444	0.104568	0.0201247	0.0407227	0.0866379	0.0171161	0.0531568
'PLAK_HUMAN'	0.0267972	0.173686	0.0581803	0.00690117	0.246067	0.33367	0.0219492	0.00522131	0.00526777
'CBPN_HUMAN'	0	0.0289497	0.0301966	0.0571337	0.0170658	0.0715267	0	0.239881	0.250579
'DESP_HUMAN'	0.028129	0.0903947	0.0322795	0	0.121755	0.223401	0.0174252	0.001939	0
'LYAM3_HUMAN'	0.024147	0.0102316	0.0329886	0.111935	0.0167821	0.0208919	0.0070637	0	0
'PGCA_HUMAN'	0	0	0	0	0	0	0.00205695	0.000645731	0.00357429
'ANK1_HUMAN'	0.0168892	0.530849	0.34368	0.0185427	0.459297	0.353335	0	0.00855869	0.00722207
'EPB42_HUMAN'	0	0.304483	0.185745	0.0110239	0.280225	0.188993	0	0.00108978	0.00103884
'AT2A2_HUMAN'	0.0222922	0.00540995	0.0197373	0.0738125	0.0101826	0.0343768	0	0	0
'TCPA_HUMAN'	0	0	0.00182022	0.0047158	0.00171377	0.00342007	0	0.00225891	0
'LOX12_HUMAN'	0	0	0.00897016	0.029784	0	0.0290583	0	0	0
'ARF4_HUMAN'	0	0	0.00535505	0	0	0	0	0	0
'VINC_HUMAN'	0.221509	0.143097	0.284938	0.306907	0.141191	0.278395	0.080868	0.016771	0.0227757
'RHD_HUMAN'	0	0.0814236	0.0592001	0	0.0584005	0.0525583	0	0	0
'GNAZ_HUMAN'	0	0.00270602	0.00754689	0	0.0175995	0.0201003	0	0	0
'HXK1_HUMAN'	0	0.0025183	0.00799989	0.101251	0	0.0046567	0	0	0.00239946
'ITIH2_HUMAN'	0.224574	0.48098	0.416212	0.268267	0.3725	0.202045	0.743462	1.46827	1.23608
'ITIH1_HUMAN'	0.101529	0.360661	0.249452	0.232522	0.260866	0.131647	0.621158	1.79592	1.39212
'C4BPB_HUMAN'	0.111177	0.0386612	0.0314593	0.0202106	0.00468116	0.00370795	0.854002	0.723542	0.739278
'CSRP1_HUMAN'	0	0.125553	0.0946487	0.181895	0.0462706	0.106951	0	0.0231885	0.0086456
'FLNA_HUMAN'	0.363622	0.66801	0.680686	0.521088	0.662242	0.664167	0.183003	0.127228	0.209941
'VDAC1_HUMAN'	0	0.0545187	0.0166237	0.155165	0.0577139	0.0558918	0.0207354	0	0
'CD9_HUMAN'	0.0585966	0.0482407	0.0648278	0.0509306	0.107051	0.0810559	0	0.0124368	0.0882203
'TENX_HUMAN'	0	0	0	0	0.00118876	0	0	0.000169424	0
'PUR6_HUMAN'	0	0	0.00391439	0	0	0.00384232	0	0	0
'GPX3_HUMAN'	0.0352143	0.139763	0.0769075	0	0.0287564	0.104468	0	0.00933231	0
'SPR1A_HUMAN'	0	0.085817	0.167469	0	0.134883	0.169256	0.0514238	0	0
'QCR2_HUMAN'	0.0381488	0.0215907	0.0112031	0.0825265	0.00257955	0.0164108	0.00535664	0	0
'TGM1_HUMAN'	0	0	0	0	0	0.00995986	0	0	0
'FBLN1_HUMAN'	0.0261592	0.0192173	0.0582396	0.121263	0.015362	0.00678807	0	0.0509071	0.109595
'PGH1_HUMAN'	0.0398075	0.0132949	0.0297879	0.053309	0.0226882	0.0239262	0	0	0
'LORI_HUMAN'	0	0	0	0	0.00515309	0.0100302	0	0	0
'COF1_HUMAN'	0.375866	0.0898597	0.292403	0.476544	0.200768	0.269576	0.162391	0.0170842	0.0510062
'AT5F1_HUMAN'	0	0.00383072	0	0.0292705	0	0.0068805	0	0	0
'THAS_HUMAN'	0.0450281	0.0506099	0.0643067	0.136836	0.0355705	0.0953902	0	0	0.00562374
'MYL9_HUMAN'	0.155647	0.101362	0.203725	0.417348	0.152804	0.228242	0	0.0167805	0.075989
'ZA2G_HUMAN'	0.0215429	0.0998006	0.0372537	0	0.151842	0.145541	0.00756232	0	0
'ATPA_HUMAN'	0.06409	0.0347268	0.134883	0.205137	0.0567433	0.155123	0.0235692	0	0
'MOES_HUMAN'	0.0780929	0.00337207	0.0302161	0.153957	0.0124624	0.0630731	0.0132341	0	0
'EF1G_HUMAN'	0	0	0	0.0254653	0.00770328	0.00375849	0	0	0
'STOM_HUMAN'	0.469231	0.467791	0.623392	0.694107	0.539389	0.738631	0.200874	0.104399	0.210468
'PON1_HUMAN'	0.251782	0.61881	0.567214	0.378443	0.624286	0.566829	0.915986	3.16479	2.54843
'AOFB_HUMAN'	0.0372436	0	0	0.052753	0.00181178	0.00830737	0	0	0
'1433T_HUMAN'	0	0.00438148	0.0787905	0.161685	0.0386426	0.139342	0	0	0
'CALR_HUMAN'	0	0.0356345	0.091723	0.0501054	0.0597909	0.134186	0	0.049571	0.0379717
'CALX_HUMAN'	0.0350072	0.0414021	0.0762223	0.058254	0.0803142	0.115403	0	0.00352923	0.00383955
'PROP_HUMAN'	0.6786	0	0	0.116508	0	0.0368256	0.03277	0	0
'KAIN_HUMAN'	0	0.0568813	0.100907	0	0.0077385	0.0108212	0	0	0
'PRDX6_HUMAN'	0.051272	0.0252349	0.1526	0.0792254	0.0420168	0.116587	0	0.0156979	0.00747186
'BLVRB_HUMAN'	0	0	0.00552972	0	0	0.00475366	0	0	0
'PRDX5_HUMAN'	0	0	0.00628655	0	0	0.0273628	0	0	0
'PRDX3_HUMAN'	0.0130796	0.00425943	0.0330772	0.0656844	0.0502812	0.0299326	0	0	0
'ATPD_HUMAN'	0	0	0.0177656	0	0.00591276	0.0225351	0	0	0
'PDIA3_HUMAN'	0.0385504	0.0286974	0.0816772	0.1241	0.073706	0.117002	0.0248097	0.0112443	0.00164716
'FCERG_HUMAN'	0	0.158643	0.155696	0	0.0714418	0.0969393	0	0	0
'PPIF_HUMAN'	0.0332935	0.00535173	0.0190815	0.244364	0.0655567	0.0572966	0	0	0
'COR1A_HUMAN'	0	0.00826128	0.0535834	0.049932	0.0650947	0.0614233	0	0.0030286	0.00587354
'GDIB_HUMAN'	0	0	0.00721926	0	0	0	0	0	0
'S10A7_HUMAN'	0.0998806	0.211736	0.0731345	0	0.201032	0.0551973	0.771356	0	0
'CASPE_HUMAN'	0	0.0355639	0.0488876	0	0.064735	0.267133	0.0275484	0	0
'1433B_HUMAN'	0.065398	0.0039434	0.0189756	0.186948	0.025583	0.0341569	0	0	0.0140482
'PRDX2_HUMAN'	0.0166468	0.250931	0.202606	0.0128613	0.313454	0.210326	0.0350617	0.00734632	0.0125175
'MA1A1_HUMAN'	0	0	0	0	0	0	0	0.036031	0.064862
'PHB_HUMAN'	0	0	0	0.0377264	0	0.00604904	0	0	0
'MYH9_HUMAN'	0.854265	0.742285	0.840047	1.0221	0.678074	0.848202	0.421358	0.164292	0.281242
'ADDA_HUMAN'	0	0.0195217	0.0151995	0	0.0374144	0.0181582	0	0	0
'ADDB_HUMAN'	0	0.042341	0.0122431	0	0.0593507	0.00567256	0	0	0
'BASI_HUMAN'	0	0	0.00221692	0.0134737	0.00245057	0.00685304	0	0	0
'ALS_HUMAN'	0	0	0.00226728	0.0150048	0	0.00894857	0.0389574	0.0107865	0.00672152
'PEDF_HUMAN'	0	0	0.00237038	0.0830391	0	0.0113123	0	0.0104419	0.00866504
'TAGL2_HUMAN'	0.0332935	0.0960072	0.271964	0.289379	0.0997755	0.187571	0.0876541	0	0.0223211
'SYUA_HUMAN'	0	0	0.0241003	0.161685	0	0.190669	0	0	0
'GRP75_HUMAN'	0.00742356	0	0.00566959	0.0497071	0.00752564	0.0150007	0	0	0
'OST48_HUMAN'	0	0	0.00999264	0.011096	0.00209574	0.0015749	0	0	0
'MDHM_HUMAN'	0.0457786	0.0234082	0.0687559	0.165053	0.070348	0.134079	0.0285688	0	0
'ECHA_HUMAN'	0	0	0.00132336	0.0204541	0	0.00588464	0	0	0
'GPDM_HUMAN'	0	0.00296343	0.00610029	0.0663705	0.0131739	0.023115	0	0	0
'AFAM_HUMAN'	0	0.05115	0.0161267	0.0164028	0	0	0	0	0.0014709
'VDAC2_HUMAN'	0	0.00891518	0	0.0928423	0.0156251	0.0433451	0	0	0
'CAZA2_HUMAN'	0	0	0.0187304	0.0900289	0.0380017	0.0289155	0	0	0
'CAPZB_HUMAN'	0.0118138	0.0229768	0.170212	0.141474	0.0523643	0.149035	0.00829416	0.0103066	0
'LEG7_HUMAN'	0	0.00937267	0	0	0.0480459	0.122957	0.0857063	0	0
'ATPO_HUMAN'	0	0.00601983	0.00936076	0.159927	0	0.0115295	0	0	0
'LIMS1_HUMAN'	0.0395923	0.12135	0.284986	0.217946	0.106248	0.229231	0.0486441	0.012634	0.0224724
'PI42A_HUMAN'	0	0	0.0169789	0	0.00559506	0.0079885	0	0	0.00648371
'TCPE_HUMAN'	0	0	0.00612954	0	0.0120816	0.0100234	0	0	0.00345524
'IDHP_HUMAN'	0.111305	0.120597	0.184342	0.2774	0.144561	0.282379	0.0453739	0.00925887	0.0157605
'MASP1_HUMAN'	0	0.0111972	0	0	0.0199709	0	0.156224	0.267417	0.262604
'TCPG_HUMAN'	0	0	0.00485889	0.027831	0.00219291	0.00298833	0	0	0
'COMP_HUMAN'	0	0	0	0	0	0	0.331466	0.336537	0.375249
'TMEDA_HUMAN'	0	0	0.0123819	0.0282948	0.00426264	0.042574	0	0	0
'SEPP1_HUMAN'	0.0170339	0.00811475	0.0227867	0.0131604	0.0108145	0.0471792	0	0.0345618	0.0351205
'CAMP_HUMAN'	0.433692	0.245959	0.206219	0	0.273836	0.0239815	0	0	0
'GNAQ_HUMAN'	0.0174395	0.0402479	0.0885719	0.0774739	0.0215167	0.0937411	0	0	0.00711174
'EMD_HUMAN'	0	0	0.0288004	0	0.0159205	0.0366943	0	0	0
'VASP_HUMAN'	0	0.16389	0.266035	0.2016	0.105163	0.236327	0.00642797	0.0119742	0.00758287
'RAB5C_HUMAN'	0	0	0.0170336	0.0123021	0.00542744	0.0435984	0	0	0
'RAB7A_HUMAN'	0	0.0147577	0.0596248	0.141474	0	0.0944741	0	0	0
'BAP31_HUMAN'	0.0392388	0.0271736	0.0292864	0.156632	0.0162932	0.060229	0	0	0
'DHB4_HUMAN'	0	0	0.00544051	0.083116	0.00159939	0.00473278	0	0	0
'LUM_HUMAN'	0	0	0	0	0	0	0.159008	0.329785	0.313986
'CAZA1_HUMAN'	0	0.0383434	0.17011	0.0385838	0.0977228	0.133849	0	0	0.00600734
'ACLY_HUMAN'	0	0.000916406	0.000908449	0	0	0.00153093	0	0	0
'COPB_HUMAN'	0	0	0.00100852	0	0	0.00266928	0	0	0
'PLTP_HUMAN'	0.0133174	0.0098943	0.0180403	0.0282948	0.00811973	0.0076667	0	0.00153313	0.0099553
'TERA_HUMAN'	0.00411493	0.00673078	0.0126247	0.0397399	0.0131446	0.021832	0	0	0.00709607
'NP1L1_HUMAN'	0	0.00244057	0.0218673	0	0.0136639	0.0143667	0	0	0
'MTPN_HUMAN'	0	0	0.0398518	0.0217652	0.0200563	0.0512504	0	0	0
'DEF3_HUMAN'	0	0.178306	0.296747	0.169769	0.132567	0.0626152	0	0.126507	0.0979957
'TPIS_HUMAN'	0.0826968	0	0.0341129	0.150601	0.0129856	0.0650557	0.0414708	0	0
'MYL6_HUMAN'	1.04483	0.652777	0.890917	1.18172	0.77871	0.885166	0.400803	0.228026	0.520022
'CDC42_HUMAN'	0.0174395	0.0275134	0.0863823	0.0673686	0.0452406	0.137355	0	0	0
'DEST_HUMAN'	0	0	0.00593523	0	0	0.0111519	0	0	0
'RAB8A_HUMAN'	0	0.0552504	0.10167	0.094316	0.00977786	0.0637313	0	0	0
'RAB10_HUMAN'	0.079615	0.105643	0.1449	0.0184531	0.140472	0.187769	0.0391268	0.0114838	0.0753451
'RAB14_HUMAN'	0	0.00972448	0.0245412	0.135579	0.0237713	0.0298301	0	0	0
'ACTZ_HUMAN'	0	0	0.0188647	0	0.00249839	0.00927278	0	0	0
'ARF1_HUMAN'	0	0	0.0552021	0.0269474	0	0.0246631	0	0	0.0490758
'RAP1B_HUMAN'	0.409827	0.28224	0.611041	0.619791	0.343524	0.587464	0.257119	0.168857	0.229881
'RAP2B_HUMAN'	0	0.0116855	0.0398961	0	0.0181485	0.0437736	0	0	0
'RHOA_HUMAN'	0.0499403	0.00558836	0.110293	0.237934	0.00475075	0.116503	0.0934978	0.00709929	0.00405169
'LYSC_HUMAN'	0.161572	0.0605263	0.110254	0.033288	0.0546359	0.0625159	0	0.0191774	0.0251156
'B2MG_HUMAN'	0	0.167474	0.184093	0.101053	0.154978	0.226306	0	0.0235607	0.0134473
'1433G_HUMAN'	0.0588582	0.00416763	0.0429237	0.192	0.0476022	0.0992945	0.0505055	0	0
'1433E_HUMAN'	0.138914	0.0945368	0.119291	0.165866	0.102309	0.221715	0.0709293	0.0110503	0.0096633
'TYB4_HUMAN'	0.659212	0.148016	0.247751	0.65078	0.1627	0.293891	0.128559	0.0153651	0
'RB11A_HUMAN'	0	0.102639	0.174703	0.200422	0.144735	0.170904	0	0.00659311	0
'H4_HUMAN'	0.199761	0	0	0.244364	0.0118194	0.078776	0.0818105	0	0
'RAB1A_HUMAN'	0	0	0.0423066	0.0246042	0.0147655	0.0202586	0	0	0
'RAN_HUMAN'	0	0	0.00371502	0	0	0.00798666	0	0	0.010298
'GBB1_HUMAN'	0.0494904	0.0916987	0.103888	0.164416	0.0980257	0.081231	0.0382204	0	0
'PPIA_HUMAN'	0.478132	0.098198	0.207131	0.424422	0.100574	0.257828	0.0928485	0.0221677	0.00526309
'RAC1_HUMAN'	0.0261592	0.0282758	0.106178	0.0808423	0.0276673	0.0703189	0	0	0.00410517
'1433Z_HUMAN'	0.634361	0.487142	0.619664	0.773054	0.430442	0.67795	0.312216	0.116752	0.322158
'TPM4_HUMAN'	0.593543	0.467221	0.772794	0.731762	0.50494	0.74819	0.727026	0.327378	0.367319
'EF1A3_HUMAN'	0	0.00560769	0.0199904	0	0.00603314	0.0255388	0	0	0
'TBA4A_HUMAN'	0.0988818	0.103654	0.143848	0.466864	0.105837	0.141554	0.17227	0.0181724	0.0523368
'HBB_HUMAN'	1.40769	2.26206	1.8576	0.795791	1.95585	1.50931	1.4704	1.21948	1.14652
'HBA_HUMAN'	1.11089	1.68044	1.79197	0.820549	1.60856	1.40837	1.40558	0.895421	0.948598
'TCPB_HUMAN'	0	0.00245778	0.00315655	0	0.00216176	0.00139168	0	0	0
'GSTO1_HUMAN'	0	0.00512563	0.0618633	0.0202106	0	0.0592386	0	0	0
'RELN_HUMAN'	0	0	0	0	0	0.000268962	0	0	0.000702831
'PHLD_HUMAN'	0	0	0.00863042	0	0.00135332	0.00366669	0	0.464622	0.484268
'DCD_HUMAN'	0.432816	0.431167	0.435493	0.244364	0.659733	0.427071	0	0.121499	0.0766614
'EM55_HUMAN'	0	0	0.00209915	0.00544131	0.0101589	0.0131537	0	0	0
'MPCP_HUMAN'	0.0137336	0.00873792	0.019933	0.0070737	0.0237525	0.0173542	0	0	0
'CLH1_HUMAN'	0.0200281	0.0184164	0.04323	0.0604212	0.0369652	0.0550313	0.00803496	0.0012445	0.00428248
'SPTB2_HUMAN'	0	0	0	0.00257225	0	0.00338096	0	0	0
'FABP5_HUMAN'	0.0244153	0.24405	0.0157381	0	0.193306	0.447968	0.231407	0	0
'CAP1_HUMAN'	0.105643	0.0926971	0.183787	0.212211	0.0867211	0.137489	0.0692243	0.0123018	0.0365242
'PFKAP_HUMAN'	0	0	0.00973414	0	0	0.013176	0	0	0
'RHAG_HUMAN'	0	0.00636732	0.00814626	0	0.0355109	0.0352087	0	0	0
'DSG1_HUMAN'	0.0514005	0.0438674	0.0204022	0.008687	0.0669935	0.226327	0	0	0
'1433F_HUMAN'	0.0588582	0.0330662	0.108836	0.202106	0.0642302	0.147587	0	0.0056994	0.00335952
'PTN12_HUMAN'	0	0.0190415	0.00209166	0	0.0102557	0.00616893	0	0	0
'CALD1_HUMAN'	0	0.0727996	0.0718124	0.0517217	0.0649788	0.0908499	0	0	0.00398883
'ITIH3_HUMAN'	0.00366229	0.00430447	0.0274225	0.0523454	0.0109904	0.00209694	0.660795	0.710473	0.642239
'PRDX1_HUMAN'	0.0749104	0.0235647	0.120793	0.0450145	0.0750701	0.195751	0.0350617	0	0
'TGM3_HUMAN'	0	0.0114094	0.00622861	0	0.0169164	0.0558759	0	0	0
'DEMA_HUMAN'	0	0.0792769	0.064534	0	0.0934049	0.101952	0	0	0
'DSC1_HUMAN'	0.0219737	0.0417709	0.0204041	0	0.0550348	0.0979895	0	0.00104314	0
'CD47_HUMAN'	0	0.0231152	0.0474446	0.00808423	0.0274873	0.0362768	0	0.00220468	0.0172052
'NEXN_HUMAN'	0	0.0166594	0.0286705	0.047158	0.0133102	0.017626	0	0	0
'FBLN3_HUMAN'	0.0699164	0.00226581	0.045851	0.0745954	0.00308228	0.00329951	0	0.00436419	0.0014185
'KIF5A_HUMAN'	0	0	0.000920541	0	0	0.000831644	0	0.000824786	0
'FLII_HUMAN'	0	0	0.000741474	0.00195137	0	0.00055271	0	0	0
'SPP24_HUMAN'	0	0	0.0245201	0	0	0.0764241	0.155343	0.294627	0.227196
'MMRN1_HUMAN'	0.115442	0.100952	0.168648	0.207085	0.125711	0.223629	0.0577586	0.0075414	0.0256224
'NNTM_HUMAN'	0.00642507	0.00247095	0.00367287	0.028543	0.00221022	0.00158831	0	0	0
'IQGA2_HUMAN'	0	0	0.00547078	0.00156325	0.00208595	0.00760048	0	0	0
'STIM1_HUMAN'	0	0	0.0066125	0.00918662	0.00930985	0.025578	0	0	0
'FHL1_HUMAN'	0.020346	0.00386409	0.0426015	0.023579	0.0212055	0.0440789	0	0	0.00281084
'PKP1_HUMAN'	0	0	0.00397519	0	0	0.0164564	0.00774454	0	0
'BLMH_HUMAN'	0	0	0	0	0.00252547	0.02039	0	0	0
'MLEC_HUMAN'	0	0.00815749	0	0.0884213	0.0103668	0.00744623	0	0	0
'SRC8_HUMAN'	0	0.00371341	0.0657599	0	0.0264254	0.0508283	0	0	0.00169269
'FLOT2_HUMAN'	0	0.0445898	0.00883593	0.00602017	0.014096	0.0235272	0	0	0
'SPRL1_HUMAN'	0	0	0	0	0	0	0.041139	0.0269672	0.0367228
'HABP2_HUMAN'	0	0.155083	0.109757	0.0673686	0.124291	0.070867	1.07133	1.2528	1.46192
'DSC3_HUMAN'	0	0	0.00238729	0	0	0.00760364	0	0	0
'ITIH4_HUMAN'	0.177781	0.332133	0.220773	0.537052	0.26335	0.196257	0.0224667	0.0194776	0.0141908
'RASA3_HUMAN'	0	0	0.000948106	0.0221053	0	0.000836013	0	0	0
'GANAB_HUMAN'	0	0	0	0.0105775	0.00222481	0.00318988	0	0.000719601	0.00287982
'LTBP1_HUMAN'	0.0372104	0.0339228	0.0658387	0.161901	0.0557805	0.0571868	0.0185621	0.000860997	0.00504753
'LASP1_HUMAN'	0	0	0.0135936	0	0.0128849	0.012657	0	0	0
'IMB1_HUMAN'	0	0	0.000962795	0.00875097	0	0.00175105	0	0	0
'SEPT2_HUMAN'	0	0	0.00934454	0	0.00307198	0.00217279	0	0	0
'PDIA6_HUMAN'	0.00762977	0.0125178	0.0359909	0.114948	0.0167459	0.0237795	0	0	0.00669399
'PLEC_HUMAN'	0	0.00196678	0	0	0.00218397	0.000197291	0	0	0
'PON3_HUMAN'	0	0	0	0	0	0	0.0321399	0.283163	0.172423
'PCBP1_HUMAN'	0	0	0.00241971	0.0382362	0.00698184	0.0173686	0	0	0
'RSU1_HUMAN'	0.034334	0.0994312	0.226923	0.106106	0.136042	0.255628	0	0.0151211	0.0302759
'FCN2_HUMAN'	0	0.260773	0.130362	0	0.295645	0.0511478	0	0.0442692	0.0511311
'CDSN_HUMAN'	0	0.00843156	0.00463205	0	0.00257644	0.0317542	0	0	0
'MARE2_HUMAN'	0.00989808	0	0.0470512	0.0382362	0.0070697	0.0418147	0.0138983	0.00879502	0.00209303
'STXB2_HUMAN'	0.0194212	0.00166644	0.0182962	0.147905	0.0108486	0.0177908	0	0	0
'ZYX_HUMAN'	0.024015	0.124226	0.211857	0.194817	0.130074	0.216193	0.00421506	0.00914063	0.0308215
'SEPT7_HUMAN'	0	0.0279151	0.0246836	0	0.0162521	0.0252885	0	0	0
'DREB_HUMAN'	0	0.0298907	0.0334558	0.00597777	0.0517961	0.0357565	0	0	0
'THTR_HUMAN'	0	0	0.00322007	0.00857418	0	0.00626559	0	0	0
'RTN1_HUMAN'	0	0	0	0	0	0.0151106	0	0	0
'INF2_HUMAN'	0	0.000816535	0.014718	0.0020805	0.00585421	0.0183765	0	0	0
'TBB8_HUMAN'	0	0.00985357	0.0321352	0	0.026234	0.027325	0	0.00479074	0.0237927
'ANO6_HUMAN'	0	0	0	0	0.00217465	0.00170396	0	0	0
'LY66F_HUMAN'	0.0228893	0.0129848	0.0441538	0.00884213	0.0254859	0.0345825	0	0	0
'KPRP_HUMAN'	0.00572233	0.134253	0.0670464	0	0.218844	0.269806	0.00401748	0.00627979	0
'XP32_HUMAN'	0	0	0	0	0.0158939	0.0581563	0	0	0
'ATLA3_HUMAN'	0	0	0.00335956	0	0.00170817	0.00997748	0	0	0
'TWF2_HUMAN'	0	0	0.00277732	0	0	0.00458935	0	0	0
'CNST_HUMAN'	0	0	0.00544659	0.00353685	0.00473241	0.00974139	0	0	0
'SBSN_HUMAN'	0.0300188	0.210989	0.0768699	0.0231925	0.133174	0.248615	0.0210753	0.0333722	0.0545385
'FBX50_HUMAN'	0	0.0133964	0.02526	0	0.00430329	0.0386363	0	0	0
'UN13D_HUMAN'	0	0.00209341	0.0162739	0.0310553	0.00399527	0.0173092	0.0020904	0	0.00158548
'CYFP1_HUMAN'	0	0	0.00370854	0.0117082	0.0042323	0.00634948	0	0	0
'GRP2_HUMAN'	0	0	0.00158615	0	0	0.00392274	0	0	0
'MYH14_HUMAN'	0	0.00236754	0.00409048	0	0.00393833	0.00568053	0	0.000708981	0.000867923
'URP2_HUMAN'	0.156611	0.164624	0.338325	0.24758	0.199037	0.344329	0.0372146	0.0147428	0.0524093
'TRML1_HUMAN'	0	0.00338878	0.0562991	0.0514451	0.022061	0.064657	0	0	0
'A16A1_HUMAN'	0	0	0.00213171	0.0033288	0	0.00472382	0	0	0
'PCSK9_HUMAN'	0	0	0	0	0	0	0	0.0162709	0.0270961
'ANGL6_HUMAN'	0	0.0427954	0.0155921	0	0.102292	0.0343228	0.0568628	0.0387559	0.0331805
'RDH11_HUMAN'	0.0523184	0.00990047	0.0118938	0.0727581	0.0224878	0.0160733	0	0	0
'BPIB1_HUMAN'	0	0.0255327	0.0125297	0	0.0820383	0.0153526	0	0	0
'UBS3B_HUMAN'	0	0.0230779	0.00533293	0	0.00991691	0.00382288	0	0.00106794	0
'ITLN1_HUMAN'	0.400817	0	0	0.553321	0	0	0.199505	0.0675947	0.044545
'OIT3_HUMAN'	0	0.00868002	0	0	0.0101784	0.00984304	0	0	0
'HMHA1_HUMAN'	0	0	0.0016179	0	0.00495542	0	0	0	0
'PRP16_HUMAN'	0	0	0	0	0.000907097	0.000569429	0	0.005699	0.00303773
'PRG4_HUMAN'	0.0460818	0.0165619	0.0165592	0.0590256	0.00291186	0.00991514	0	0	0.0041183
'AT2A3_HUMAN'	0.0995885	0.0573716	0.120228	0.142715	0.0650105	0.161843	0.007894	0.00628275	0.00454946
'ESAM_HUMAN'	0	0	0.008557	0	0	0.00220395	0	0	0
'SYTL4_HUMAN'	0	0.00465692	0.00288958	0.022338	0.00303673	0.00118573	0	0	0
'OPTN_HUMAN'	0	0.024497	0.00366921	0	0.00255485	0.00779899	0	0.00962408	0.0189935
'ZG16B_HUMAN'	0	0.0152015	0	0	0	0.0448351	0	0	0.0509412
'CKLF5_HUMAN'	0	0.0632686	0.0294875	0	0.0241013	0.0613261	0	0	0
'CNDP1_HUMAN'	0	0.00630223	0.00790737	0	0	0	0	0.863604	0.696376
'SPB12_HUMAN'	0	0	0.00515715	0	0.00964548	0.04475	0	0	0
'PGRP2_HUMAN'	0.070883	0.118215	0.124243	0.0889917	0.111104	0.0500493	0	0.0369039	0.0384171
'MYADM_HUMAN'	0	0.00397254	0	0	0	0.00308335	0	0	0
'CNN2_HUMAN'	0	0.0227271	0.130287	0.120669	0.0819577	0.181771	0	0	0.0177881
'PHB2_HUMAN'	0	0	0.0152364	0.167197	0.00723254	0.0244213	0	0	0
'MGLL_HUMAN'	0	0	0	0	0	0.0091397	0	0	0
'OMD_HUMAN'	0	0	0	0	0	0	0	0.00520242	0.0130563
'TBA1C_HUMAN'	0	0.00985331	0.0573145	0.384809	0.0292052	0.0668027	0	0.00154131	0
'ESYT1_HUMAN'	0.00297747	0	0.00339429	0.0149525	0.00470606	0.0121601	0	0	0
'TMED9_HUMAN'	0	0	0.00332631	0	0	0.0058661	0	0	0
'COL11_HUMAN'	0	0.428455	0.246014	0	0.385294	0.116705	0.323615	0.249531	0.218254
'JAM3_HUMAN'	0	0	0.00259086	0	0	0.0140414	0	0	0
'ASPN_HUMAN'	0	0	0	0	0	0	0	0	0.00643099
'SPR2G_HUMAN'	0	0.0151765	0	0	0.149624	0	0	0	0
'RAB1B_HUMAN'	0	0.0769412	0.191275	0.186488	0.126551	0.295752	0.0116872	0.00697025	0.0410533
'SH3L3_HUMAN'	0	0.0605245	0.0704391	0.0282948	0.0561945	0.0763217	0	0.0228453	0
'TBB1_HUMAN'	0.289321	0.568212	0.764284	0.628145	0.623374	0.817333	0.169698	0.1732	0.281264
'EHD1_HUMAN'	0	0	0	0.00695774	0	0.00321868	0	0	0
'PPIP2_HUMAN'	0	0	0.0273898	0.0761783	0.013393	0.0145246	0	0	0
'PARVB_HUMAN'	0.0174395	0.0688939	0.197352	0.124632	0.0768757	0.258706	0.0214266	0.026909	0.0524529
'RETN_HUMAN'	0	0.0103295	0.0322713	0	0.370194	0	0	0	0
'CRAC1_HUMAN'	0.0261592	0	0	0.0808423	0	0	0.0669958	0.126701	0.0713195
'RTN4_HUMAN'	0.0225372	0.0311299	0.0315495	0.0195887	0.0252512	0.0466763	0	0	0
'PDLI7_HUMAN'	0	0.00281124	0.00816112	0	0.00255692	0.0279331	0	0	0
'RAB6B_HUMAN'	0	0.090339	0.0959044	0.246042	0.115418	0.143696	0	0	0
'SAC1_HUMAN'	0.0054661	0.0146655	0.0141161	0.0823505	0.0337928	0.0270828	0	0	0
'TBA8_HUMAN'	0	0.0511103	0.0344033	0.234847	0.0437064	0.0590626	0	0	0.00208102
'TMOD3_HUMAN'	0	0	0.0395001	0.0672002	0.0231737	0.0529212	0.00642797	0	0
'EHD3_HUMAN'	0.0120075	0.0229319	0.0402119	0.0347887	0.00940449	0.0765368	0	0	0.00720492
'CALL5_HUMAN'	0.206004	0.324131	0.193194	0.0176843	0.278296	0.413768	0.152664	0	0.0105512
'VAPA_HUMAN'	0	0.018288	0.0148337	0.0101053	0.0258455	0.0582444	0	0	0
'STAR9_HUMAN'	0	0	0.000207864	0	0	0	0	0.00229533	0.000475247
'DKK3_HUMAN'	0	0	0	0	0	0	0.00676628	0.0407313	0.0548219
'BIN2_HUMAN'	0	0.052749	0.120571	0	0.0907202	0.156433	0	0.00906423	0.00319639
'FBLN5_HUMAN'	0	0	0	0	0	0	0	0.017144	0.00690132
'MARCO_HUMAN'	0	0	0	0	0	0	0.0169795	0.011537	0.00498469
'SLAF5_HUMAN'	0	0	0.0024123	0	0	0.00467999	0	0	0
'ATIF1_HUMAN'	0	0.0425354	0.0314193	0	0.0601055	0.0311027	0	0.0194676	0
'DBNL_HUMAN'	0	0	0.0270408	0.0324211	0.00950957	0.015614	0	0.00494657	0
'ZPI_HUMAN'	0.0143619	0	0.0298362	0.127604	0	0.0396047	0.264681	0.283303	0.29094
'MYH2_HUMAN'	0	0.00518831	0	0	0	0.000358701	0	0	0
'MYH13_HUMAN'	0.0166468	0.000553685	0	0.115751	0.000816939	0	0	0	0.000454349
'COR1C_HUMAN'	0.01382	0.124809	0.153468	0.19486	0.150796	0.124965	0.0121282	0.0148791	0
'VDAC3_HUMAN'	0.0236277	0.0633063	0.0805581	0.219057	0.109137	0.13648	0	0	0
'TLN1_HUMAN'	0.400817	0.575245	0.712952	0.553321	0.605486	0.731641	0.199505	0.110778	0.194742
'ANGL3_HUMAN'	0	0	0	0	0	0	0.00476146	0.00587958	0.0116694
'FHOD1_HUMAN'	0	0.00104647	0.00499835	0	0.00180461	0.01329	0	0.00247466	0
'JAM1_HUMAN'	0.0998806	0.0391238	0.0720831	0.184345	0.0738469	0.0576627	0	0	0
'CBPQ_HUMAN'	0	0	0	0	0	0	0	0.0106877	0.00345172
'EMIL1_HUMAN'	0.0290929	0.00973411	0.0229104	0.0687537	0.0399104	0.0224348	0.00240298	0.000720951	0.0103806
'COL10_HUMAN'	0	0.207613	0.0858057	0	0.135571	0.0112974	0.157589	0.0797781	0.0426612
